# Supplementary material for: Autophagy Contributes to the Quality Control of Leaf Mitochondria
Source: PubMed Central journal article supplement (PMC8112837; doi:10.1093/pcp/pcaa162), 2020-12-23
Supplement: pcaa162_supplementary_data.pdf [file pcaa162_supplementary_data.pdf]

# Fig. S1

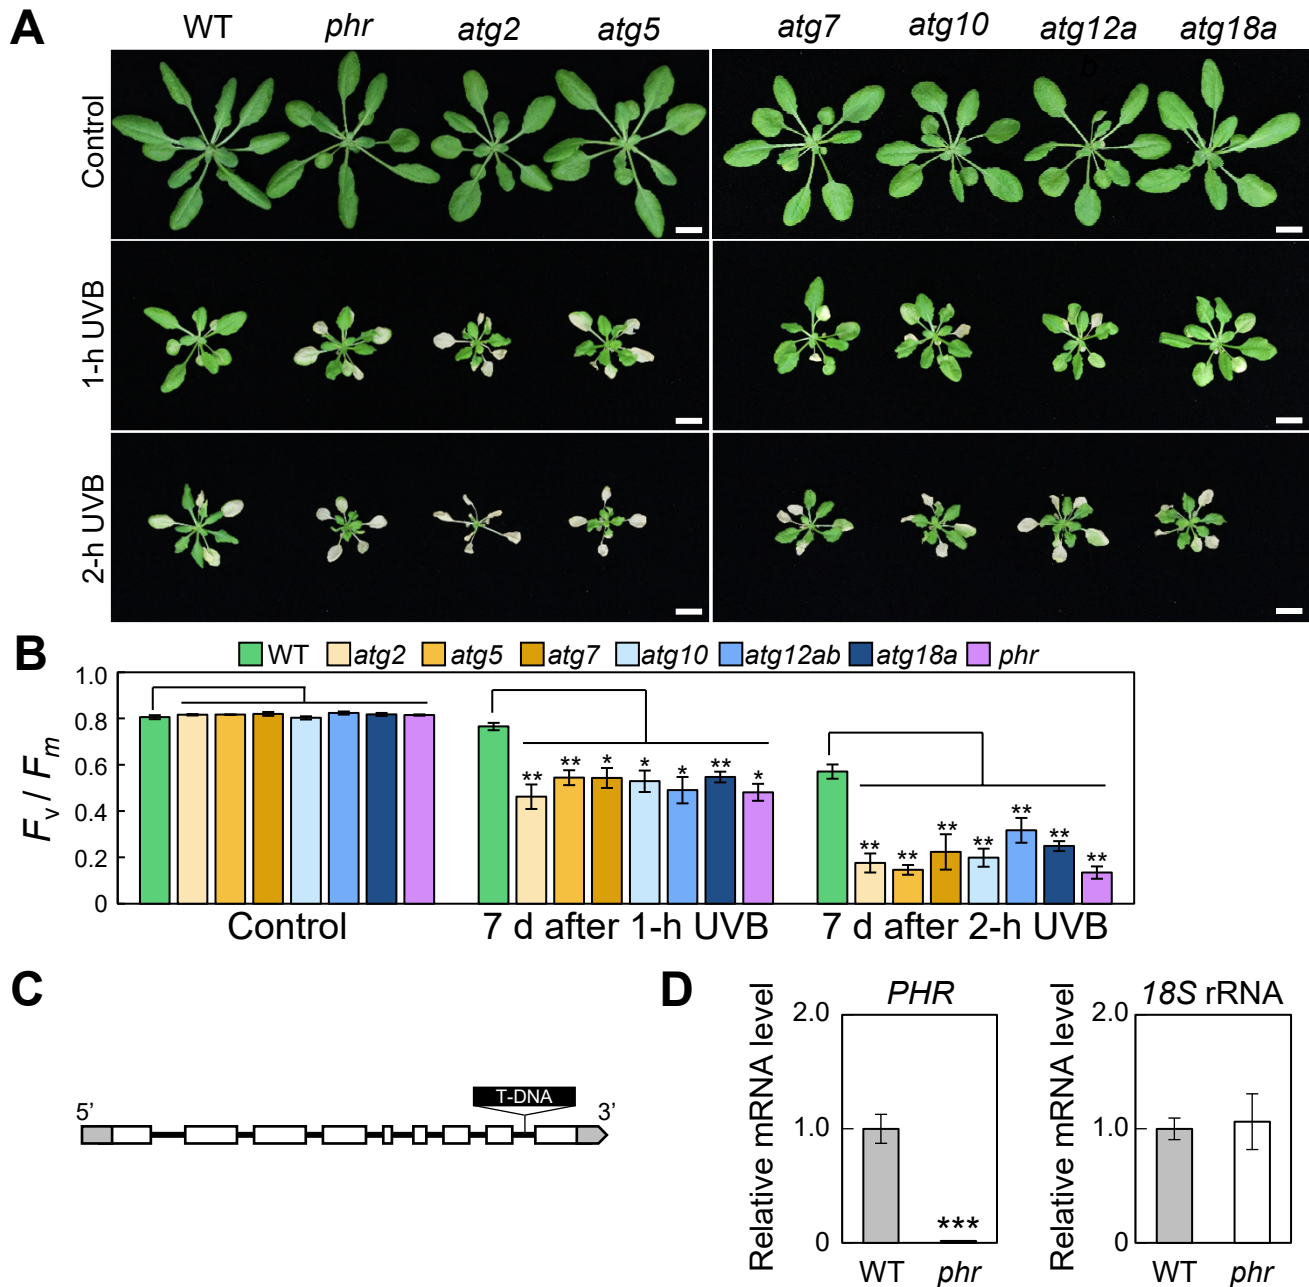

## Supplementary Figure S1. Six T-DNA insertion mutants of core *ATG* genes are sensitive to UVB.

(A) Visual phenotypes of Arabidopsis plants 7 d before (control), or after 1-h UVB, or 2-h UVB exposure. Wild-type (WT), *phr*, *atg2*, *atg5*, *atg7*, *atg10*, *atg12a* *atg12b*, and *atg18a* plants were subjected to UVB exposure (wavelength 280–315 nm) of  $1.5 \text{ W m}^{-2}$  for 1 or 2 h. Scale bars = 10 mm.

(B) Mean  $F_v/F_m$  ratios in the leaves of WT, *atg2*, *atg5*, *atg7*, *atg10*, *atg12a* *atg12b*, *atg18a*, and *phr* plants 7 d after 0-h (control), 1-h or 2-h UVB treatment ( $\pm$ SE,  $n = 4$ ). Plant photographs in the same treatment groups are shown in Supplemental Figure S1A. Asterisks denote significant differences compared to WT data based on Dunnett's test (\* $P < 0.05$ , \*\* $P < 0.01$ ).

(C) Isolation of *PHR*-knockout Arabidopsis plants. The T-DNA insertion site in *phr-3* mutant, in the accession Columbia-0 (WisCDsLox368H08). Gray boxes, open boxes, and lines indicate untranslated regions, exons, and introns, respectively.

(D) Transcript levels of *PHR* and *18S rRNA* in leaves of WT and *phr-3* mutant plants ( $\pm$ SE,  $n = 4$ ). Asterisks denote significant differences based on Student's *t*-test (\*\* $P < 0.001$ ).

# Fig. S2

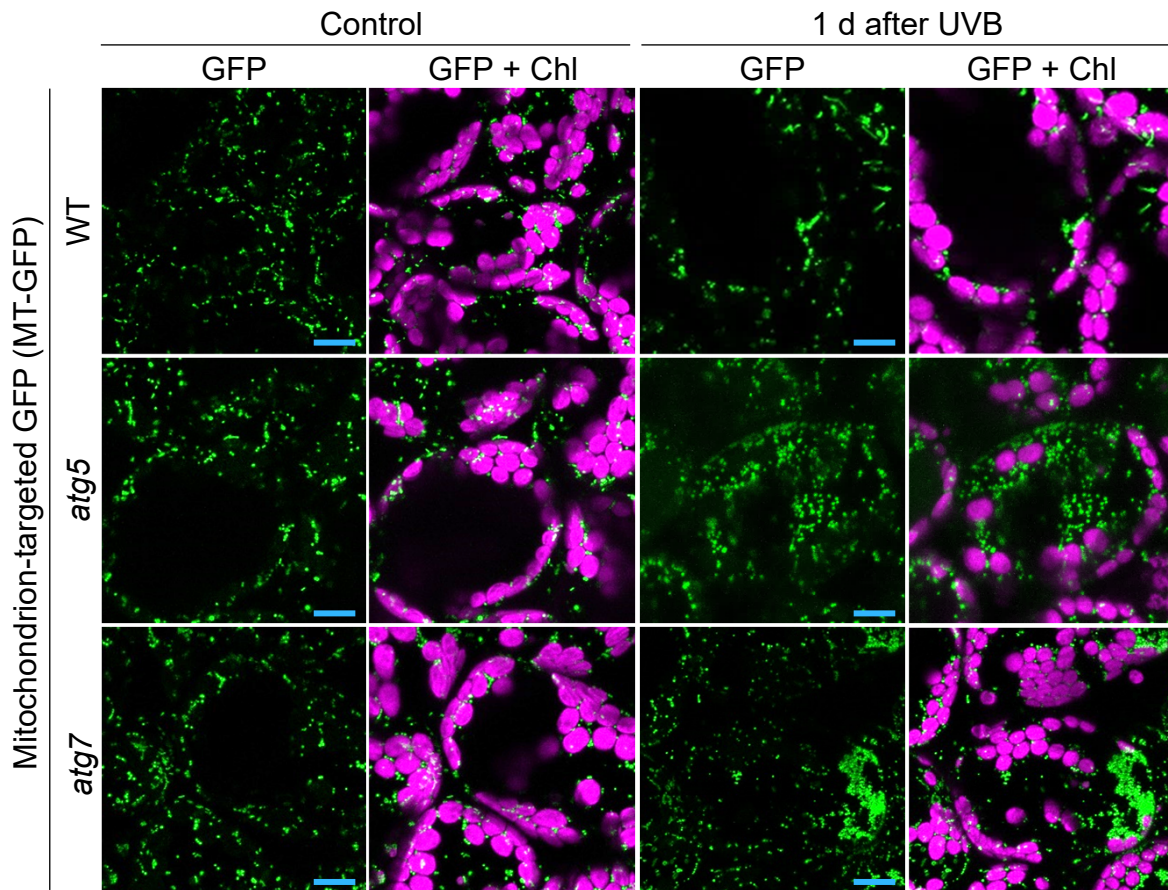

**Supplementary Figure S2. The mitochondrial marker expressed from the strong 35S promoter *Pro35S:MT-GFP* also shows elevated mitochondrial population in UVB-damaged *atg* leaves.**

Confocal images of mesophyll cells from WT, *atg5*, and *atg7* plants expressing mitochondrion-targeted GFP (*MT-GFP*), either untreated (control) or 1 d after a 1-h UVB ( $1.5 \text{ W m}^{-2}$ ) exposure. Green, GFP; magenta, chlorophyll autofluorescence (Chl). Orthogonal projections created from *z*-stack images are shown. Scale bars = 10  $\mu\text{m}$ .

# Fig. S3

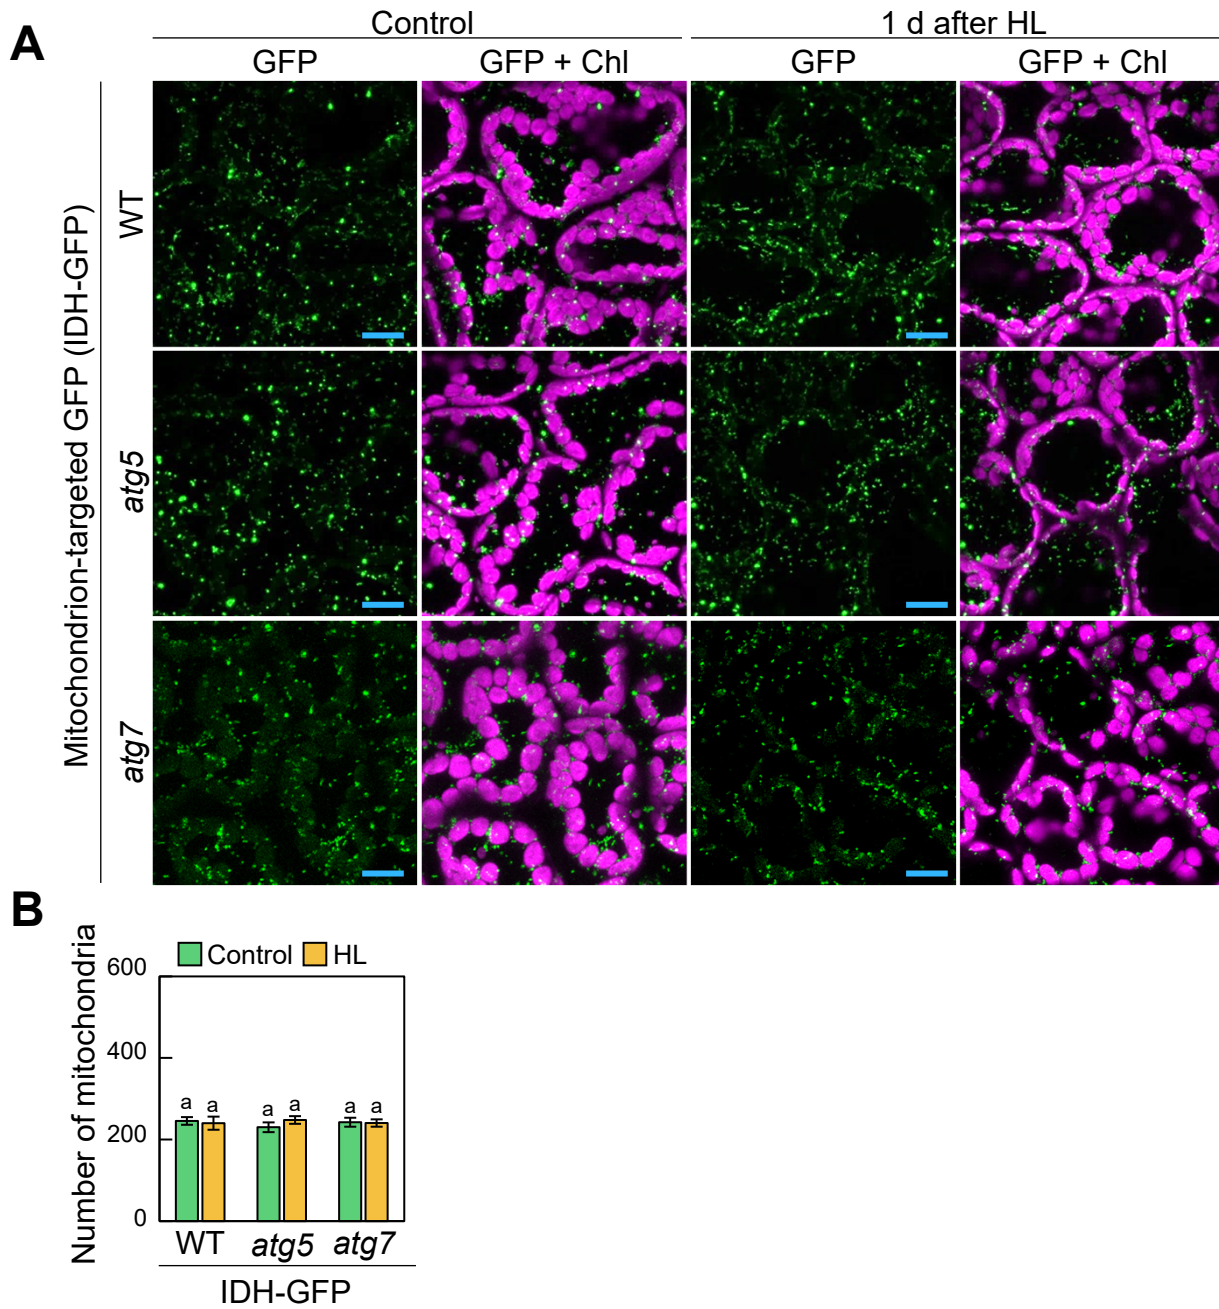

## Supplementary Figure S3. Damage from strong visible light does not affect the mitochondrial population in leaves.

(A) Confocal images of mesophyll cells from WT, *atg5*, and *atg7* plants expressing isocitrate dehydrogenase-GFP (*IDH-GFP*), either untreated (control) or 1 d after 2 h HL ( $2000 \mu\text{mol m}^{-2} \text{s}^{-1}$ ) exposure. Green, GFP; magenta, chlorophyll autofluorescence (Chl). Orthogonal projections created from *z*-stack images are shown. Scale bars = 10  $\mu\text{m}$ .

(B) Number of mitochondria obtained from the three-dimensional images described in (A) ( $\pm$ SE,  $n = 4$ ). Different letters denote significant differences based on Tukey's test ( $P < 0.05$ ).

# Fig. S4

**A**

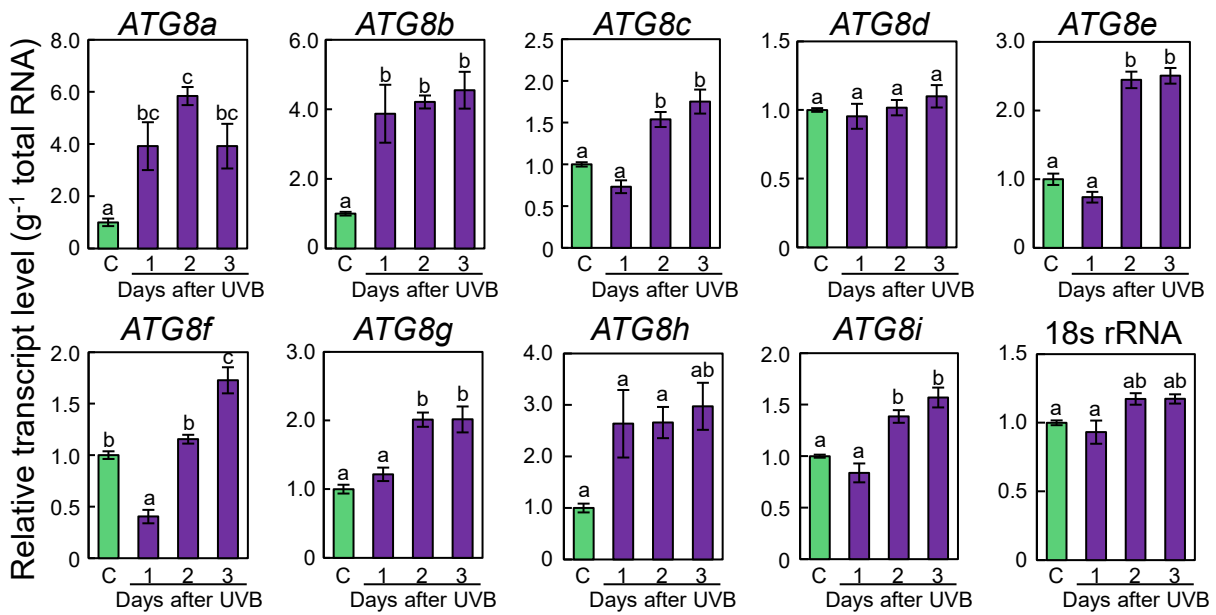

**B**

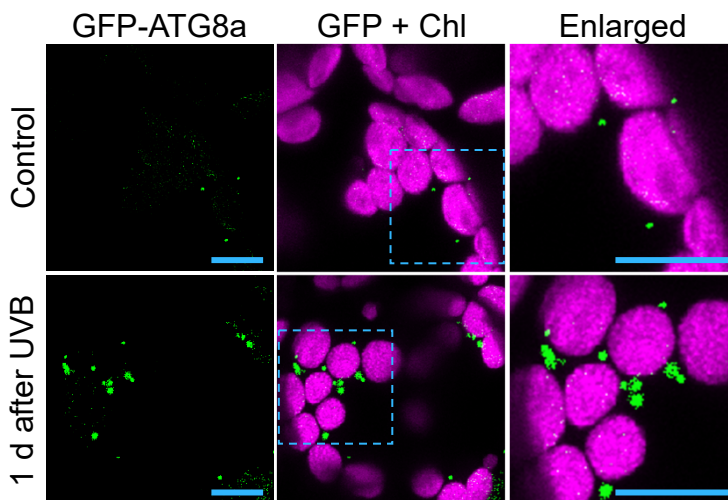

**C**

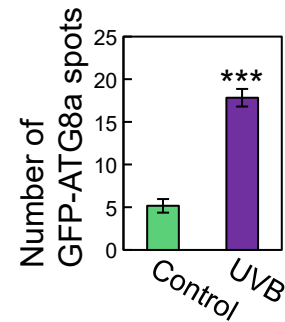

## Supplementary Figure S4. UVB damage activates autophagosome formation.

(A) *ATG8* transcript levels measured in leaves from untreated plants (control) or plants 1, 2 or 3 d after 2 h UVB ( $1.5 \text{ W m}^{-2}$ ) exposure ( $\pm$ SE,  $n = 3$ ). Transcript levels of the respective genes are shown relative to the values from WT control leaves, which are set to 1. The level of *18S* rRNA was measured as an internal control. Different letters in each graph denote significant differences based on Tukey's test ( $P < 0.05$ ).

(B) Confocal images of mesophyll cells expressing *GFP-ATG8a* from untreated control plants or plants 1 d after a 1-h UVB ( $1.5 \text{ W m}^{-2}$ ) exposure. Green, GFP-ATG8a; magenta, chlorophyll autofluorescence (Chl). Scale bars = 10  $\mu$ m.

(C) Number of GFP-ATG8a-labeled autophagic structures obtained from the observations described in (B) ( $\pm$ SE,  $n = 4$ ). Asterisks denote significant differences between control and UVB-treated plants based on Student's *t*-test (\*\*\*) ( $P < 0.001$ ).

# Fig. S5

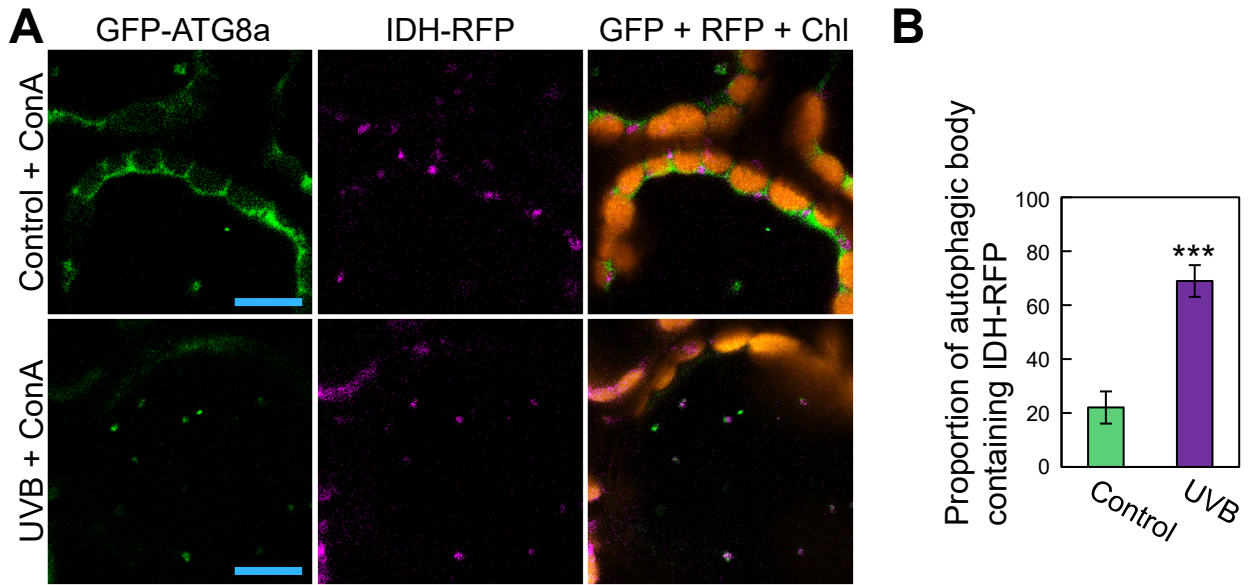

**Supplementary Figure S5. Swapped fluorescent markers also show activation of autophagosomal transport of mitochondria in UVB-damaged leaves.**

(A) Confocal images of mesophyll cells expressing mitochondrial *IDH-RFP* and autophagosomal *GFP-ATG8a* from concanamycin A (ConA)-treated leaves. Leaves of untreated control plants or plants immediately after a 1-h UVB ( $1.5 \text{ W m}^{-2}$ ) exposure were incubated for 2 d with ConA. Green, GFP-ATG8a; magenta, IDH-RFP; orange, chlorophyll autofluorescence (Chl). Scale bars = 10  $\mu\text{m}$ .

(B) Proportion of autophagic bodies associated with mitochondrial IDH-RFP signals obtained from the observations described in (A) ( $\pm$ SE,  $n = 4$ ).

# Fig. S6

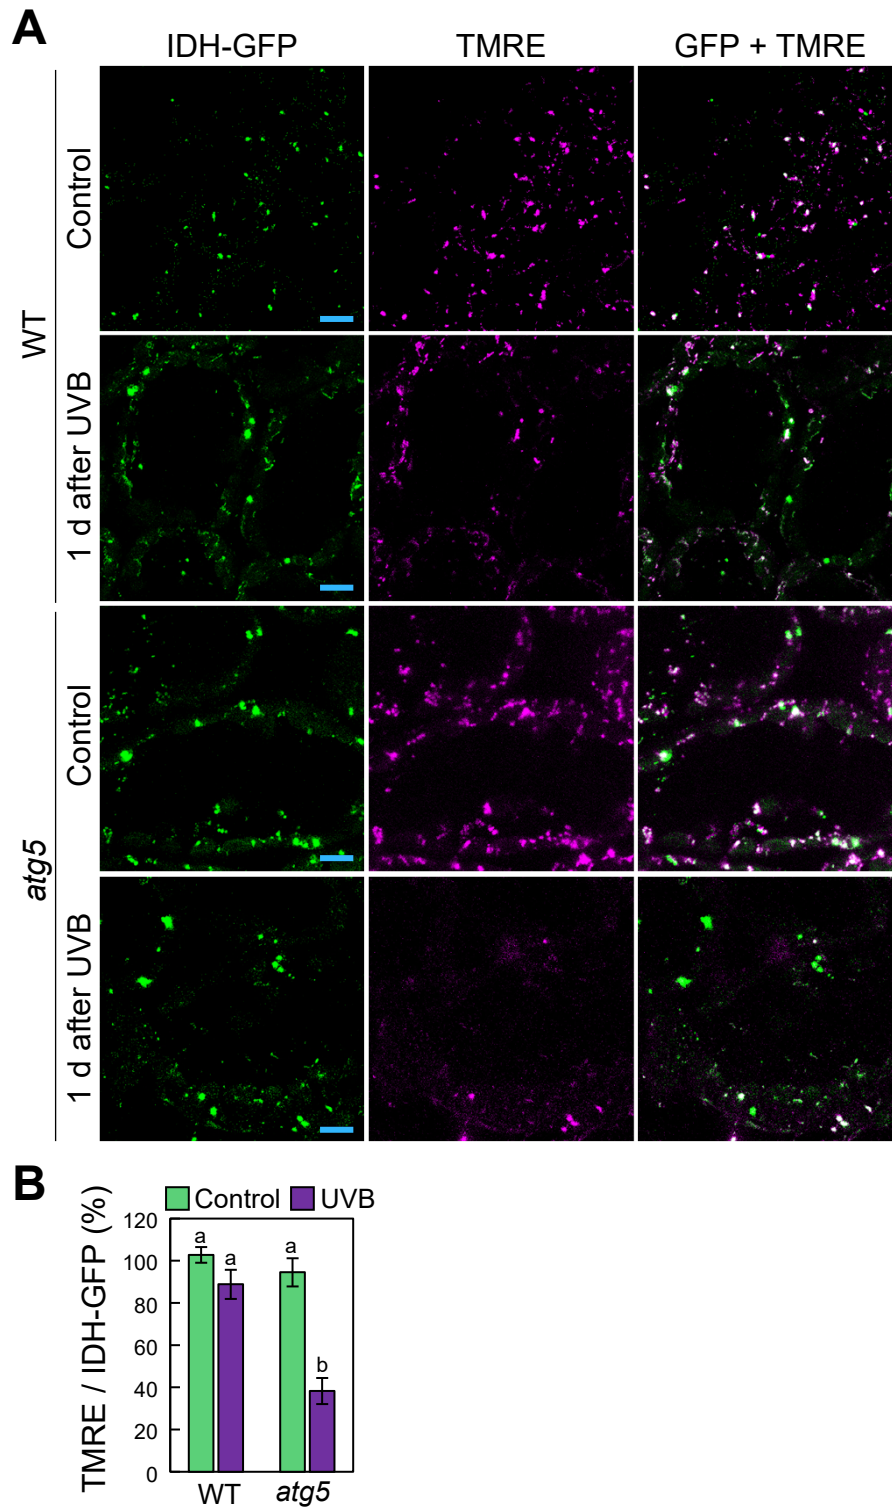

**Supplementary Figure S6. The *ProIDH:IDH-GFP* mitochondrial marker indicates the cytoplasmic accumulation of depolarized mitochondria in UVB-damaged *atg5* plants.**

(A) Confocal images of TMRE-stained mesophyll cells from WT and *atg5* plants expressing *IDH-GFP*, either untreated (control) or 1 d after a 1-h UVB ( $1.5 \text{ W m}^{-2}$ ) exposure. Green, mitochondrial *IDH-GFP*; magenta, TMRE. Orthogonal projections created from *z*-stack images are shown. Scale bars = 10  $\mu\text{m}$ .

(B) Proportion of TMRE particles among the *IDH-GFP*-labeled particles. Different letters in each graph denote significant differences based on Tukey's test ( $P < 0.05$ ).

# Table S1

| Gene (Locus)        | Primer sequence (5' to 3')                            |                                                       | Amplicon size (bp) | Reference |
|---------------------|-------------------------------------------------------|-------------------------------------------------------|--------------------|-----------|
|                     | Forward                                               | Reverse                                               |                    |           |
| <b>Gene cloning</b> |                                                       |                                                       |                    |           |
| SWIB2 (At2g14880)   | CACCATGGCGGTTTCTTCT                                   | GAGGAAGTGAGGACCGAT                                    | 427                | 1         |
| IDH1 (At4g35260)    | CACCTGAAATTCGAGGGTGCAAG                               | GTCTAGTTTTGCAATGACCGCATC                              | 2136               | 1         |
| ATG8a (At4g21980.1) | GGGGACAAGTTTGTACAAAAAAGCAGGCTTC<br>ATGGCTAAGAGTTCCTTC | GGGGACCACTTTGTACAAGAAAGCTGGGTTT<br>AAGCAACGGTAAGAGATC | 429                | 1         |
| <b>qRT-PCR</b>      |                                                       |                                                       |                    |           |
| GFP                 | GTGACCACCTTCACCTACGG                                  | GTCCTTGAAGAAGATGGTGC                                  | 126                | 1         |
| IDH1 (At4g35260)    | ATTACGTGTTCCCGCTCTGC                                  | AGGCGCCAACAAACGTAGC                                   | 198                | 2         |
| ATG5 (At5g17290)    | ATGGCGAAGGAAGCGGTCA                                   | TCACCTTTGAGGAGCTTTCACAAGG                             | 1014               | 1         |
| 18S rRNA            | AATTGTTGGTCTTCAACGAGGAA                               | AAAGGGCAGGGACGTAGTCAA                                 | 74                 | 4         |
| AOX1a (At3g22370)   | GACGGTCCGTACGGTTTCG                                   | CTTCTGATTCGCGTCCCTCCT                                 | 175                | 5         |
| ATG8a (At4g21980)   | CAATTTGTATACGTGGTTCGT                                 | AGCAACGGTAAGAGATCCAA                                  | 189                | 6         |
| ATG8b (At4g04620)   | TTGGCCAATTTGTGTACGTT                                  | TCCACCAAATGTGTTCTCTCC                                 | 181                | 6         |
| ATG8c (At1g62040)   | TGAGTGCCGAAAAGGCTATC                                  | ACCAAACAAAGGTGTTCTCT                                  | 145                | 6         |
| ATG8d (At2g05630)   | TTGACTGTTGGCCAGTTTG                                   | AACCCGTCTTCGTCTTTGTG                                  | 150                | 6         |
| ATG8e (At2g45170)   | TCTTTAAGATGGACGACGATTTTC                              | CTCAGCCTTTTCCACAATCA                                  | 101                | 7         |
| ATG8f (At4g16520)   | TGGGGCAGTTTGTGTATG                                    | GGAACCCATCATCCTCTTTT                                  | 144                | 6         |
| ATG8g (At3g60640)   | TGTGATTCGTAAGAGAATCCAAC                               | CCAAAAGTGTTCCTCCACT                                   | 162                | 6         |
| ATG8h (At3g06420)   | CCAAAGCTCTCTTTGTTTTCG                                 | AAGAACCCGTCTTCTCTCTTG                                 | 97                 | 6         |
| ATG8i (At3g15580)   | TGCAACAACACTCTCCCTCA                                  | AACCAAAGGTTTTCTCACTGC                                 | 201                | 6         |

<sup>1</sup>This study, <sup>2</sup>Lemaitre and Hodges, 2006, <sup>3</sup>Kwon et al., 2010, <sup>4</sup>Izumi et al., 2012, <sup>5</sup>Thirkettle-Watts et al., 2003, <sup>6</sup>Rose et al., 2006, <sup>7</sup>Izumi et al., 2013

## Supplemental Table S1. Primer sequences used in this study.

Primer sequences for gene cloning or RT-qPCR analysis.
